# Supplementary material for: Intestinal epithelium dysfunctions cause IgA deposition in the kidney glomeruli of intestine-specific Ap1m2-deficient mice
Source: PubMed Central journal article supplement — eBioMedicine. 2024 Jul 25;106:105256. doi: 10.1016/j.ebiom.2024.105256 (PMC11338063; doi:10.1016/j.ebiom.2024.105256), 2024-07-25
Supplement: mmc2.pdf [file mmc2.pdf]

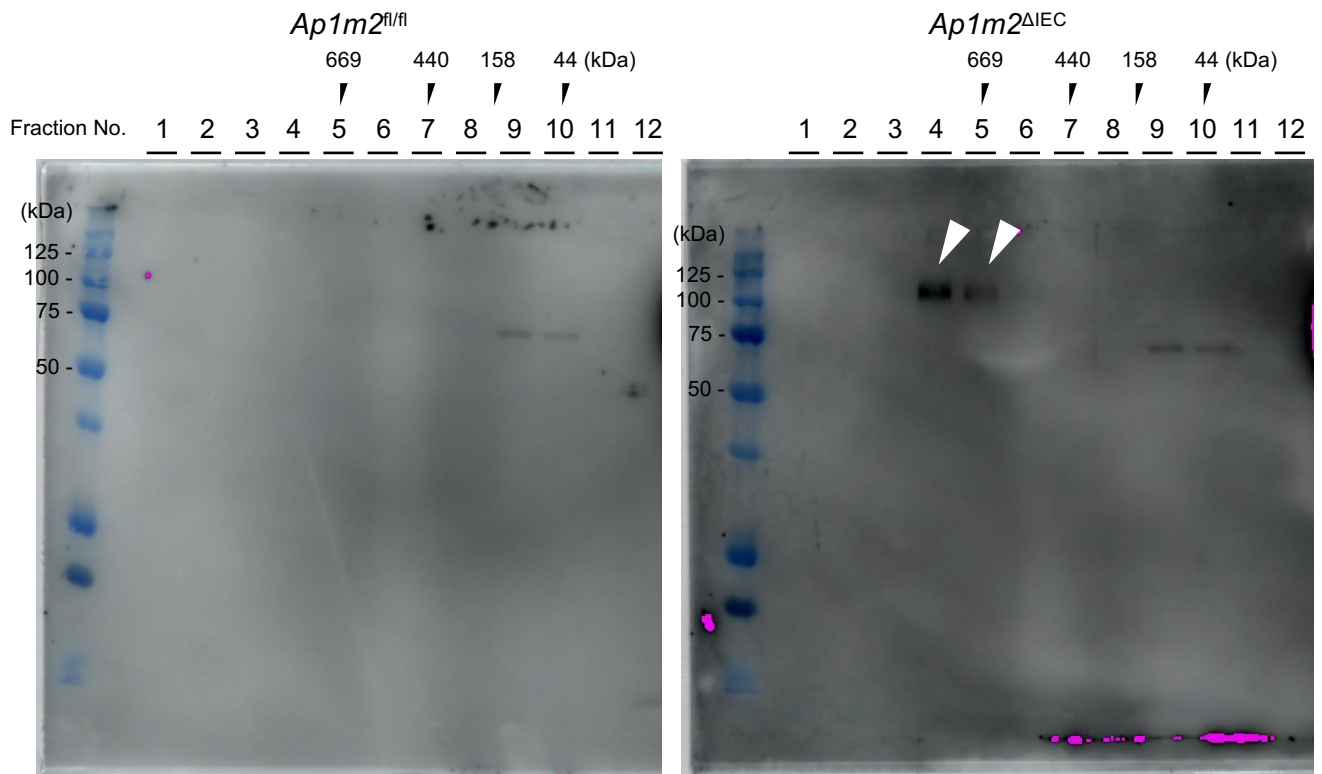

**Supplementary figure 1 The high molecular weight of IgA fraction contains secretory components.**

The fractions from the size exclusion chromatography shown in Figure 2C were conducted to western blotting with SDS-PAGE in a reduced condition. Secretory components of IgA were detected by anti-pIgR antibody.

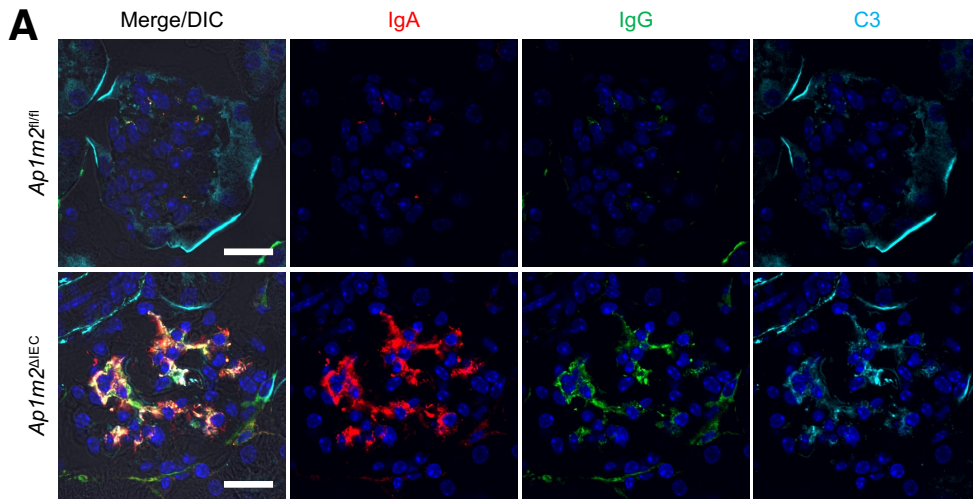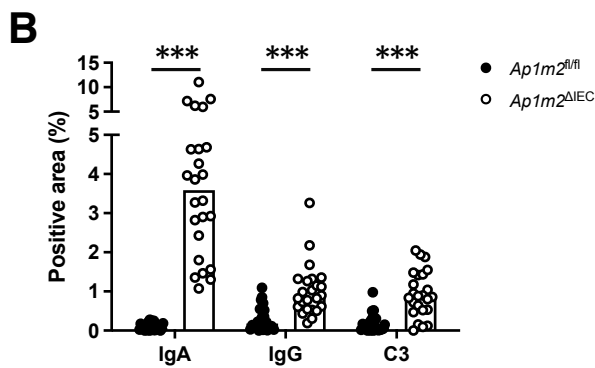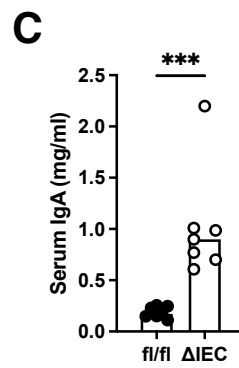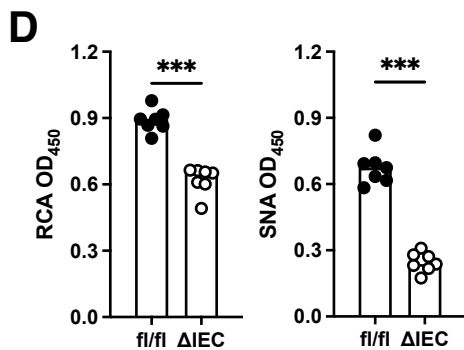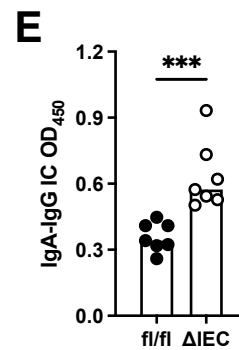

**Supplementary figure 2 *Ap1m2<sup>ΔIEC</sup>* male mice display the renal deposition of IgA-IgG immune complex similar to *Ap1m2<sup>ΔIEC</sup>* female male.**

(A) Immunofluorescence images of IgA (red), IgG (green), complement C3 (cyan), and nuclei (blue) in the kidney from *Ap1m2<sup>fl/fl</sup>* and *Ap1m2<sup>ΔIEC</sup>* male mice. Scale bars: 20  $\mu$ m. (B) Quantitative data of (A): the percentage of IgA<sup>+</sup>, IgG<sup>+</sup>, or C3<sup>+</sup> area in a glomerulus area.  $n = 24$ , four glomeruli each from six different mice. (C) IgA concentration in the serum from *Ap1m2<sup>fl/fl</sup>* and *Ap1m2<sup>ΔIEC</sup>* male mice is measured by ELISA.  $n = 7$  from two independent experiments. (D) Quantification of galactose or sialic acid in the serum IgA glycans by lectin-binding assay. 100 ng serum IgA is reacted with *Ricinus communis* agglutinin I (RCA) or *Sambucus nigra* lectin (SNA), and the optical density (OD) is measured.  $n = 7$  from two independent experiments. (E) Quantification of IgA-IgG immune complex (IC) in the serum. Serum IgA-IgG immune complex captured by anti-IgG antibody is detected with anti-IgA antibody and the OD is measured.  $n = 7$  from two independent experiments. Bars represent the median. \*\*\* $p < 0.001$  (unpaired, two-tailed Mann-Whitney test)

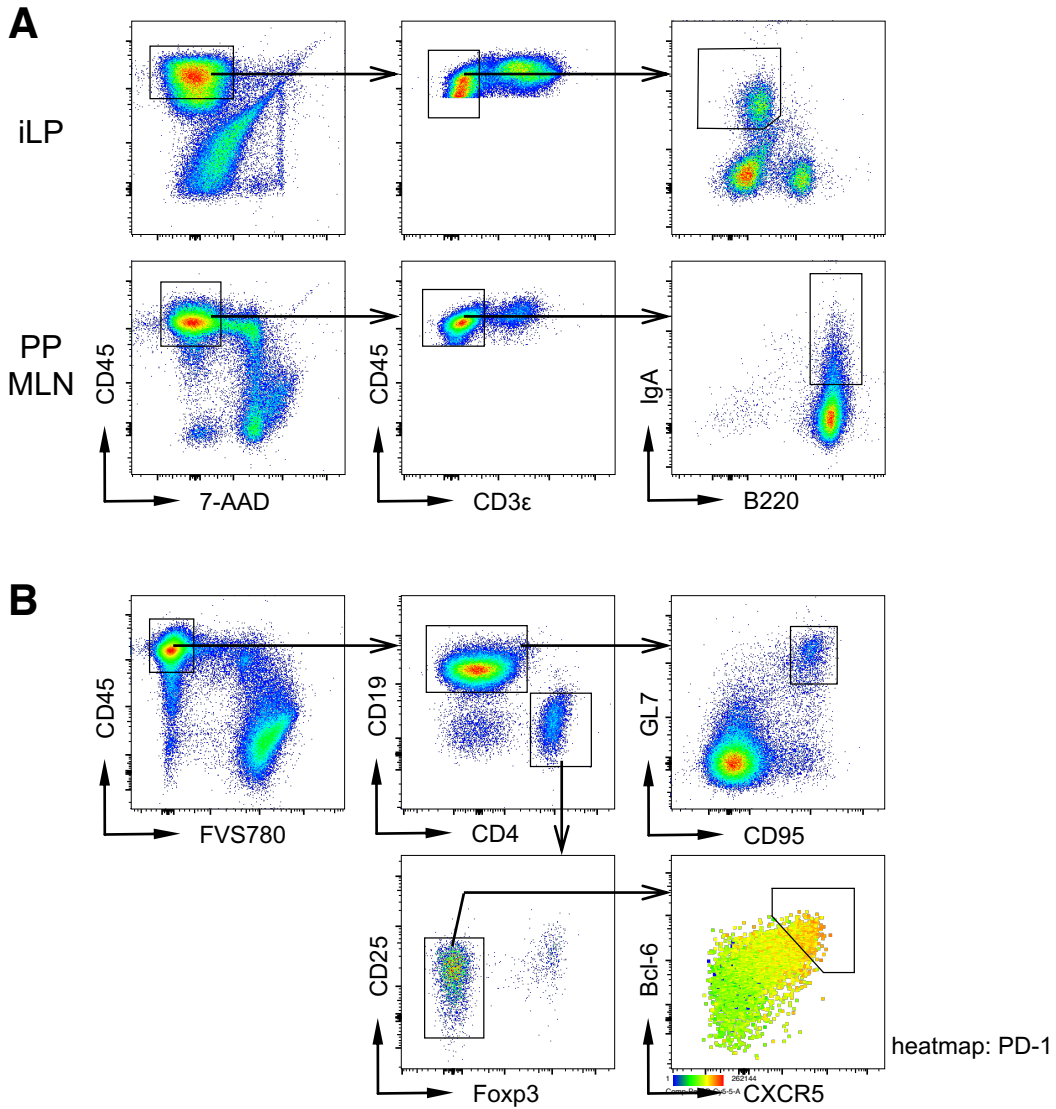

**Supplementary Figure 3 Flow cytometry analysis of immune cell subsets in the intestinal lamina propria, Peyer's patches, and mesenteric lymph nodes.**

(A) Gating strategy to analyze IgA<sup>+</sup> B cells in the ileal lamina propria (iLP), Peyer's patches (PP), and mesenteric lymph nodes (MLN). (B) Gating strategy to analyze germinal center B cells and follicular helper T cells in the Peyer's patches and mesenteric lymph nodes.

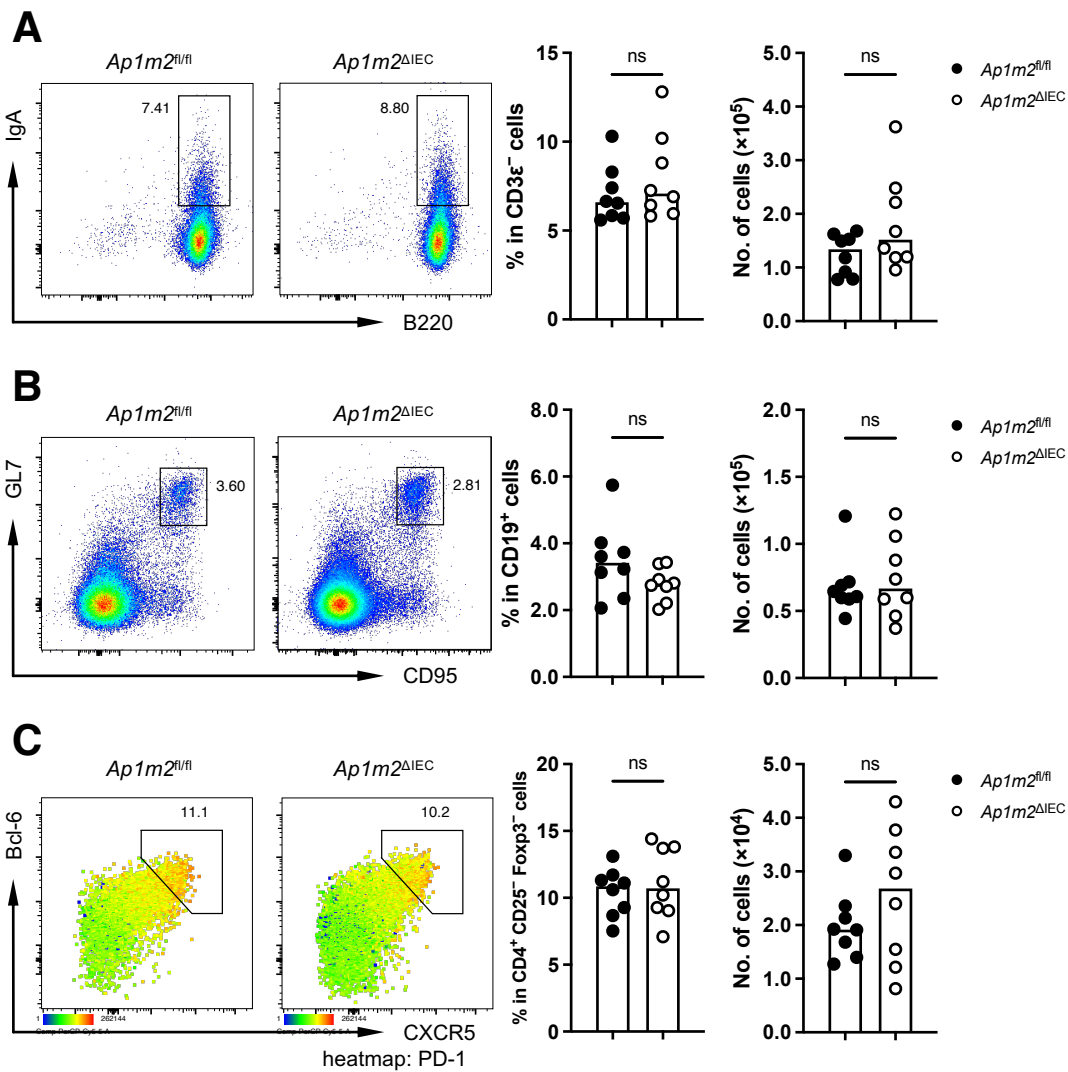

**Supplementary Figure 4 The composition of immune cells in the ileal Peyer's patches of *Ap1m2<sup>ΔIEC</sup>* mice.**

(A)–(C) The frequency and the number of IgA<sup>+</sup> B cells (A), germinal center B cells (CD19<sup>+</sup>, CD95<sup>+</sup>, GL7<sup>+</sup>) (B), and follicular helper T cells (CD4<sup>+</sup>, CD25<sup>-</sup>, Foxp3<sup>-</sup>, CXCR5<sup>+</sup>, Bcl-6<sup>+</sup>, PD-1<sup>+</sup>) (C) are measured by flow cytometry. Leucocytes are isolated from the ileal Peyer's patches of *Ap1m2<sup>fl/fl</sup>* and *Ap1m2<sup>ΔIEC</sup>* female mice.  $n = 8$  from two independent experiments. Bars represent the median. ns: not significant (unpaired, two-tailed Mann-Whitney test)

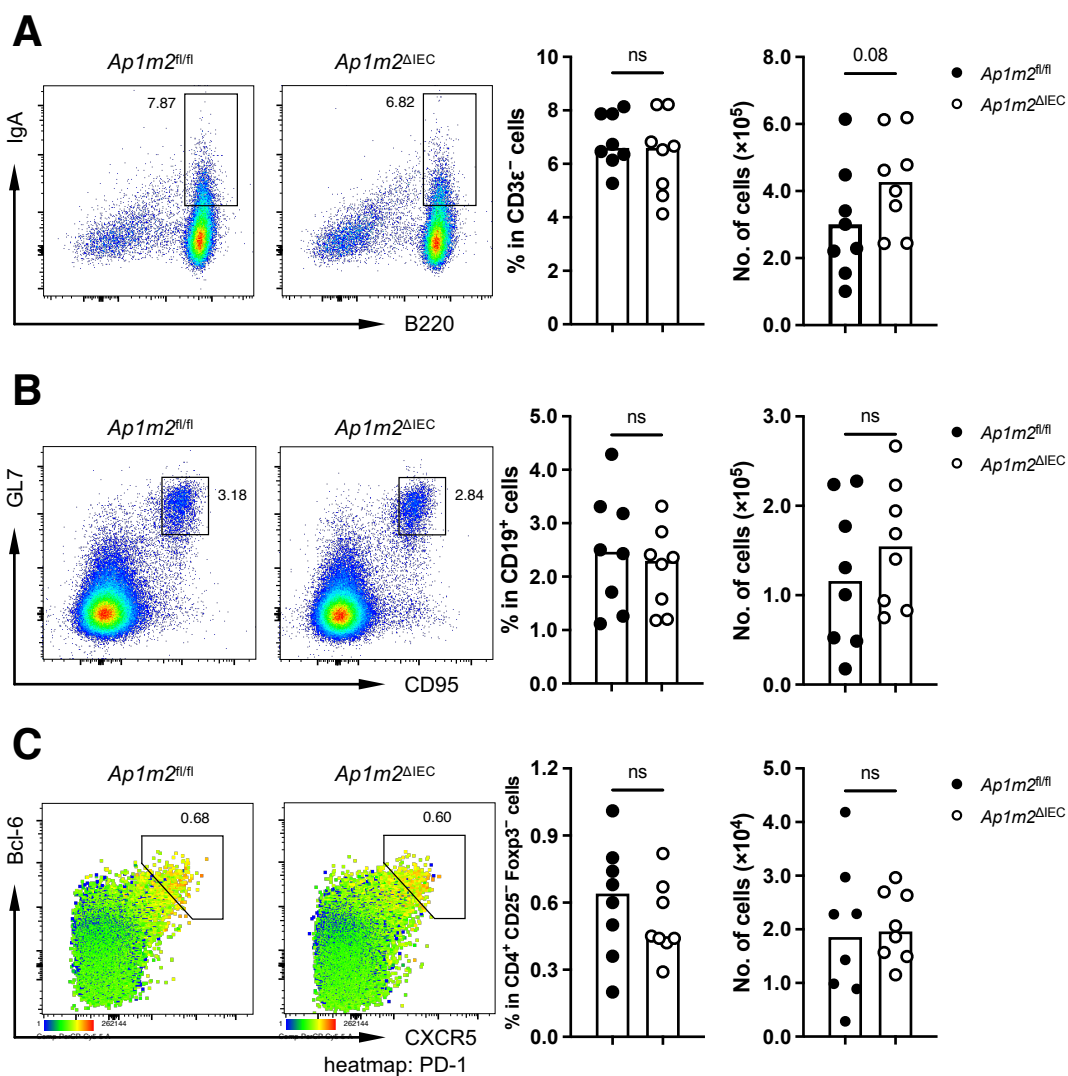

**Supplementary Figure 5 The composition of immune cells in the mesenteric lymph nodes of *Ap1m2<sup>ΔIEC</sup>* mice.**

(A)–(C) The frequency and the number of IgA<sup>+</sup> B cells (A), germinal center B cells (CD19<sup>+</sup>, CD95<sup>+</sup>, GL7<sup>+</sup>) (B), and follicular helper T cells (CD4<sup>+</sup>, CD25<sup>-</sup>, Foxp3<sup>-</sup>, CXCR5<sup>+</sup>, Bcl-6<sup>+</sup>, PD-1<sup>+</sup>) (C) are measured by flow cytometry. Leucocytes are isolated from the mesenteric lymph nodes of *Ap1m2<sup>fl/fl</sup>* and *Ap1m2<sup>ΔIEC</sup>* female mice.  $n = 8$  from two independent experiments. Bars represent the median. ns: not significant (unpaired, two-tailed Mann-Whitney test)
