# Supplementary figures and images for: Intestinal epithelium dysfunctions cause IgA deposition in the kidney glomeruli of intestine-specific Ap1m2-deficient mice
Source: PubMed Central journal article supplement — eBioMedicine. 2024 Jul 25;106:105256. doi: 10.1016/j.ebiom.2024.105256 (PMC11338063; doi:10.1016/j.ebiom.2024.105256), 2024-07-25

Fig. 7A

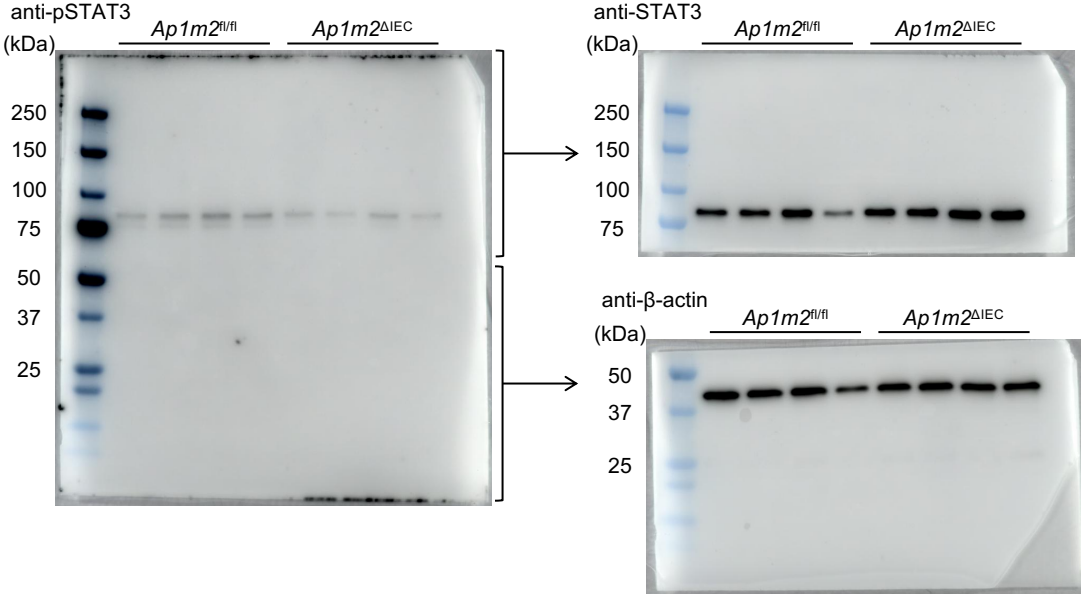

# Supplementary Fig. 1

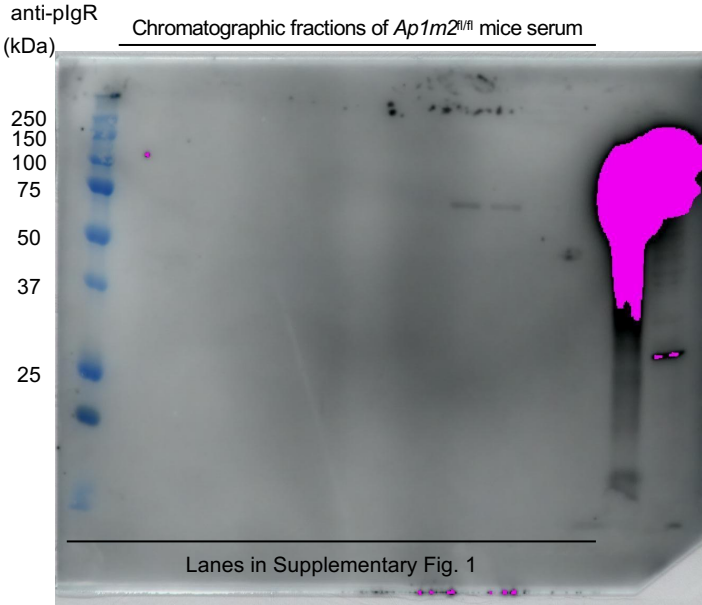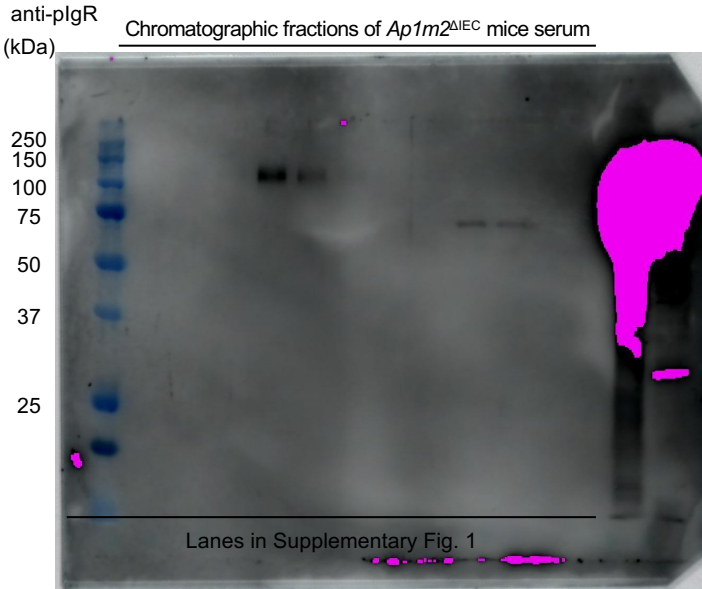

Supplement: mmc1.pdf [file mmc1.pdf]
